# Supplementary material for: Amidoxime Modified UiO-66@PIM-1 Mixed-Matrix Membranes to Enhance CO2 Separation and Anti-Aging Performance
Source: MDPI journal article supplement (doi:10.3390/membranes13090781), 2023-09-06
Supplement: s1 [file s1]

# Supplementary Information

## Amidoxime Modified UiO-66@PIM-1 Mixed-Matrix Membranes to Enhance CO<sub>2</sub> Separation and Anti-Aging Performance

Jiaming Gao<sup>1</sup>, Yongchao Sun<sup>1</sup>, Feifei Kang<sup>1</sup>, Fei Guo<sup>1</sup>, Gaohong He<sup>1</sup>, Hanli Wang<sup>2</sup>,  
Zhendong Yang<sup>2</sup>, Canghai Ma<sup>1</sup>, Xiaobin Jiang<sup>1</sup> and Wu Xiao<sup>1,\*</sup>

<sup>1</sup> State Key Laboratory of Fine Chemicals, Frontier Science Center for Smart Materials, Dalian University of Technology, Dalian 116024, China; jiaminggao97@outlook.com (J.G.); yongchao\_sun@mail.dlut.edu.cn (Y.S.); kangfeifei1998@outlook.com (F.K.); guofei@mail.dlut.edu.cn (F.G.); hgaohong@dlut.edu.cn (G.H.); cma@dlut.edu.cn (C.M.); xbjiang@dlut.edu.cn (X.J.)

<sup>2</sup> Shandong Huaxia Shenzhou New Material Co., Ltd., Zibo 256401, China; whl89333@huaxiashenzhou.com (H.W.); yangzhendong@huaxiashenzhou.com (Z.Y.)

\* Correspondence: wuxiao@dlut.edu.cn

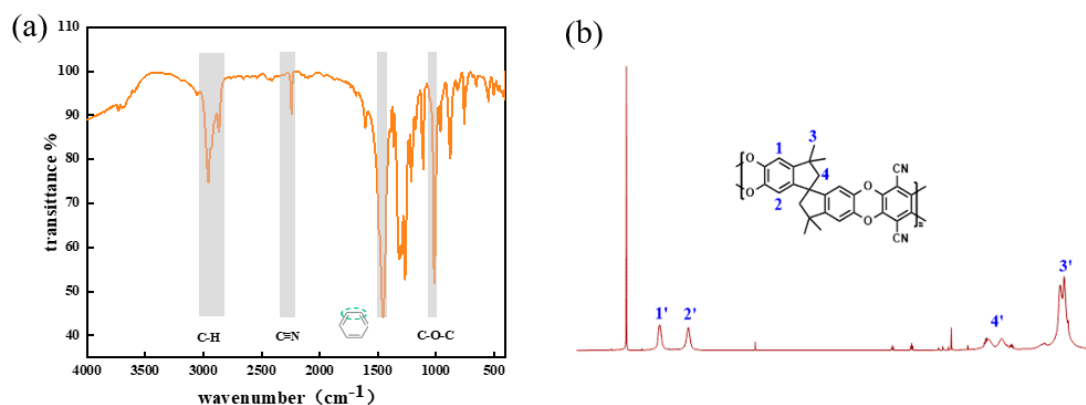

Figure S1. Chemical structure characterization of PIM-1: (a) FT-IR spectra; (b) <sup>1</sup>H NMR spectra.

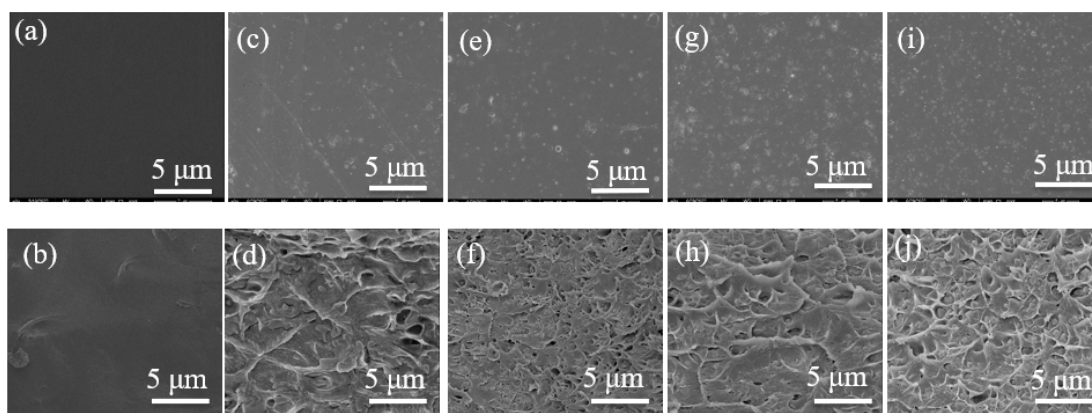

Figure S2. Surface and cross-sectional SEM images of UiO-66-AO@PIM-1 MMMs with different loadings: (a,b) 0 wt%; (c,d) 10 wt%; (e,f) 10 wt%; (g,h) 20 wt%; (i,j) 30 wt%

Table S1. Averaged permeabilities and selectivities at 25 °C and 2 bar, for the pristine PIM-1 and the UiO-66-CN MMMs.

| UiO-66-CN | Permeability (P) (Barrer) |                |                 | Ideal selectivity ( $\alpha$ )  |                                  |
|-----------|---------------------------|----------------|-----------------|---------------------------------|----------------------------------|
|           | CO <sub>2</sub>           | N <sub>2</sub> | CH <sub>4</sub> | CO <sub>2</sub> /N <sub>2</sub> | CO <sub>2</sub> /CH <sub>4</sub> |
| 0         | 5573.24                   | 300.97         | 496.18          | 18.52                           | 11.23                            |
| 5 wt%     | 6288.54                   | 312.39         | 504.69          | 20.13                           | 12.46                            |
| 10 wt%    | 7135.02                   | 318.49         | 515.50          | 22.40                           | 13.84                            |
| 20 wt%    | 9027.93                   | 468.47         | 566.72          | 19.23                           | 15.93                            |
| 30 wt%    | 9965.11                   | 549.63         | 704.23          | 18.13                           | 14.15                            |

Table S2. Diffusivity ( $10^{-8}$  cm<sup>2</sup> s<sup>-1</sup>) and solubility ( $10^{-2}$  cm<sup>3</sup>(STP) cm<sup>3</sup> atm<sup>-1</sup>) coefficients, diffusivity selectivity ( $\alpha_D$ ) and solubility selectivity ( $\alpha_S$ ) for UiO-66-CN/PIM-1 MMMs.

| UiO-66-CN loading | Diffusivity     |                |                 | Solubility      |                |                 | $\alpha_D$                      |                                  | $\alpha_S$                      |                                  |
|-------------------|-----------------|----------------|-----------------|-----------------|----------------|-----------------|---------------------------------|----------------------------------|---------------------------------|----------------------------------|
|                   | CO <sub>2</sub> | N <sub>2</sub> | CH <sub>4</sub> | CO <sub>2</sub> | N <sub>2</sub> | CH <sub>4</sub> | CO <sub>2</sub> /N <sub>2</sub> | CO <sub>2</sub> /CH <sub>4</sub> | CO <sub>2</sub> /N <sub>2</sub> | CO <sub>2</sub> /CH <sub>4</sub> |
| 0%                | 83.3            | 49.3           | 31.3            | 66.9            | 6.1            | 15.9            | 1.7                             | 2.7                              | 11.0                            | 4.2                              |
| 5%                | 89.2            | 51.1           | 31.5            | 70.5            | 6.1            | 16.0            | 1.8                             | 2.8                              | 11.2                            | 4.4                              |
| 10%               | 93.1            | 55.8           | 32.0            | 76.7            | 5.7            | 16.1            | 1.9                             | 2.9                              | 11.8                            | 4.8                              |
| 20%               | 111.7           | 72.2           | 35.6            | 80.8            | 6.4            | 15.9            | 1.5                             | 3.1                              | 12.6                            | 5.1                              |
| 30%               | 119.9           | 82.0           | 43.5            | 83.1            | 6.7            | 16.2            | 1.4                             | 2.8                              | 12.5                            | 5.1                              |

Table S3. Diffusivity ( $10^{-8}$  cm<sup>2</sup> s<sup>-1</sup>) and solubility ( $10^{-2}$  cm<sup>3</sup>(STP) cm<sup>3</sup> atm<sup>-1</sup>) coefficients, diffusivity selectivity ( $\alpha_D$ ) and solubility selectivity ( $\alpha_S$ ) for UiO-66-AO@PIM-1 MMMs.

| UiO-66-AO loading | Diffusivity     |                |                 | Solubility      |                |                 | $\alpha_D$                      |                                  | $\alpha_S$                      |                                  |
|-------------------|-----------------|----------------|-----------------|-----------------|----------------|-----------------|---------------------------------|----------------------------------|---------------------------------|----------------------------------|
|                   | CO <sub>2</sub> | N <sub>2</sub> | CH <sub>4</sub> | CO <sub>2</sub> | N <sub>2</sub> | CH <sub>4</sub> | CO <sub>2</sub> /N <sub>2</sub> | CO <sub>2</sub> /CH <sub>4</sub> | CO <sub>2</sub> /N <sub>2</sub> | CO <sub>2</sub> /CH <sub>4</sub> |
| 0%                | 83.3            | 49.3           | 31.3            | 63.9            | 6.1            | 15.9            | 1.7                             | 2.7                              | 11.0                            | 4.2                              |
| 5%                | 88.9            | 47.8           | 28.7            | 71.3            | 6.2            | 16.0            | 1.9                             | 3.1                              | 11.5                            | 4.5                              |
| 10%               | 99.3            | 43.6           | 30.9            | 75.9            | 6.4            | 16.2            | 2.3                             | 3.2                              | 11.9                            | 4.7                              |
| 20%               | 105.5           | 52.8           | 31.5            | 79.6            | 6.8            | 16.1            | 2.0                             | 3.4                              | 11.7                            | 4.9                              |
| 30%               | 108.3           | 57.4           | 31.7            | 81.2            | 7.1            | 16.1            | 1.9                             | 3.3                              | 11.4                            | 5.1                              |
